# Supplementary material
Source: PubMed Central journal article supplement (PMC3174044)
Supplement: 97320630007098S1.pdf [file 97320630007098S1.pdf]

## Supplementary material:

**Table 1:** Summary of data available in the DDTRP

| S. No        | Pathogen                          | Number of drugs included in the database | Number of current targets included in the database | Number of target-metabolic pathways | Number of potential alternate targets |
|--------------|-----------------------------------|------------------------------------------|----------------------------------------------------|-------------------------------------|---------------------------------------|
| 1            | <i>Mycobacterium tuberculosis</i> | 12                                       | 12                                                 | 11                                  | 86                                    |
| 2            | <i>Mycobacterium leprae</i>       | 3                                        | 4                                                  | 4                                   | 16                                    |
| 3            | <i>Staphylococcus aureus</i>      | 4                                        | 7                                                  | 5                                   | 47                                    |
| 4            | <i>Streptococcus pneumoniae</i>   | 8                                        | 10                                                 | 7                                   | 43                                    |
| 5            | <i>Plasmodium falciparum</i>      | 6                                        | 5                                                  | 3                                   | 16                                    |
| 6            | <i>Plasmodium vivax</i>           | 6                                        | 5                                                  | 3                                   | 11                                    |
| 7            | <i>Neisseria gonorrhoeae</i>      | 7                                        | 9                                                  | 7                                   | 46                                    |
| Total Number |                                   | 46                                       | 52                                                 | 40                                  | 265                                   |
